# Supplementary material
Source: HighWire-hosted journal article supplement (https://www.annfammed.org/highwire/filestream/13242/field_highwire_adjunct_files/0/Jackson_Supplemental.pdf)
Supplement: Jackson_Supplemental.pdf [file Jackson_Supplemental.pdf]

**Supplemental materials for:**

Jackson CE, Goetze R, Gregor K, Vanerian S. Neuropsychologist consultations in a primary care setting. *Ann Fam Med.* 2020;18(3):375.

Colleen E. Jackson, PhD<sup>1,2</sup>

Rachel E. Goetze, PhD<sup>1,3</sup>

Kristin Gregor, PhD<sup>2,4</sup>

Sally S. Vanerian, MD<sup>5,6,7</sup>

<sup>1</sup>Psychology Service, VA Boston Healthcare System, Boston, Massachusetts

<sup>2</sup>Department of Psychiatry, Boston University School of Medicine, Boston, Massachusetts

<sup>3</sup>Department of Psychiatry and Psychology, Mayo Clinic, Rochester, Minnesota

<sup>4</sup>Mental Health Service, VA Boston Healthcare System, Boston, Massachusetts

<sup>5</sup>Primary Care Service, VA Boston Healthcare System, Boston, Massachusetts

<sup>6</sup>Department of Medicine, Boston University School of Medicine, Boston, Massachusetts

<sup>7</sup>Department of Medicine, Harvard Medical School, Boston, Massachusetts

**Key words:** cognitive impairment; cognitive evaluation; collaborative care; primary care

Submitted July 26, 2019; submitted, revised, October 9, 2019; accepted November 4, 2019.

**Funding support:** This clinical service was supported in part by a US Department of Veterans Affairs Spark-Seed-Spread Innovation Grant awarded to C.E.J.

**Disclaimer:** The views expressed in this article are those of the authors and do not reflect official policy or position of the US Department of Veterans Affairs or the United States Government.
